# Supplementary material
Source: publisher figshare collection journal article supplement (https://wiley.figshare.com/ndownloader/files/5627475)
Supplement: Supplementary file 1 [file 5627475]

<!--?php include 'header.php'; ?--><!doctype html><html><head>
        <meta http-equiv="Content-Type" content="text/html, charset=UTF-8">
        <title>Ecological Archives E094-184-A2</title>
        
        <script type="text/javascript" src="http://www.esapubs.org/templates/scripts/analytics.js"></script>
    <style type="text/css">
body {background-color: #FFF; font-family: Times New Roman, Times, serif;}

hr {
	height: .15em;
	color: gray;
	background-color: gray;
	border-width: 0;
}
hr.divider {
	width: 50em;
	margin-top: 1.7em;
	margin-bottom: 2em;
	margin-left: 0;
}

p {max-width: 50em;}

li {max-width: 48em;}

sub, sup {font-size: .7em;}

table, td {
	border: 1px solid black;
	border-collapse: collapse;
	text-align: center;
    vertical-align: top;
}
td {max-width: 70em; padding: .1em;}
table, tr {
	padding: .1em;}
tr:first-child {font-weight: bold;}

table.equation {border: none; width: 48em;}
.equation td {border: none; text-align: left; vertical-align: middle;}
.equation tr:first-child {font-weight: normal;}
.equation td:last-child {text-align: right; width: 3em;}

table.noFormat {border: none; text-align: inherit;}
.noFormat td {border: none; text-align: inherit;}
.noFormat tr:first-child {font-weight: normal;}

/* Position modifiers.  Use these to alter placement of elements on the page. */

.center {margin-left: auto; margin-right: auto; text-align: center;}
.textCenter {text-align: center;}
.textLeft  {text-align:left;}

.indent {margin-left: 2em;}
p.indent {max-width: 48em;}
p.heading.indent {max-width: 40em;}
.halfIndent {margin-left: 1em;}

/* Font modifiers.  Use these to alter font style and type. */

.courier {font-family: Courier new, Courier, mono;}
.heading {max-width: 45em; margin-top: .7em; font-size: 1.2em; font-weight: bold;}
.overline {text-decoration: overline;}
.over {text-decoration: overline;}
.roman{font-style: normal; text-decoration: none; font-weight: normal;}
.smallcaps {font-variant: small-caps;}

#links {font-size: .7em; font-family: Arial, Helvetica, sans-serif;}
</style></head>
    <body bgcolor="#FFFFFF">
        <p class="heading center"><i>Ecological Archives</i> E094-184-A2</p>
        <p class="heading">Marie Duhamel, Roel Pel, Astra Ooms, Heike Bücking, Jan Jansa, Jacintha Ellers, Nico M. van Straalen, Tjalf Wouda, Philippe Vandenkoornhuyse, E. Toby Kiers. 2013. Do fungivores trigger the transfer of protective metabolites from host plants to arbuscular mycorrhizal hyphae?. <i>Ecology</i> 94:2019–2029. <a href="http://dx.doi.org/10.1890/12-1943.1">http://dx.doi.org/10.1890/12-1943.1</a></p>
        <!-- Content starts here!  Don't delete anything before this! -->
        <p>
            <span class="smallcaps">Appendix B.</span> The qPCR methodology and probe design.
        </p>
        <p>qPCR assays were run in 9 μl reactions, using the  LightCycler 2.0 instrument (Roche), LightCycler  TaqMan chemistry (LightCycler TaqMan Master) and 20 μL-Lightcycler glass capillaries. The final concentrations of the primers and the hydrolysis probe were 0.5 μM and 0.11 μM, respectively (for sequences see Table 1). Each reaction included 2.25 μL of the DNA sample.</p>
         
    <p><span class="smallcaps">Table B1</span>. qPCR markers for specific quantification of <i>Glomus intraradices</i> and <i>G. custos </i>by  measuring gene copies of the mitochondrial large ribosomal subunit. <i>FAM </i>– fluorescein, <i>BHQ1 </i>– fluorescence quencher.</p>
    <table border="0" cellspacing="0" cellpadding="0">
      <tbody><tr>
        <td width="119" valign="top"><p>Fungus</p></td>
        <td width="236" valign="top"><p>Sequences 5`→3`</p>
          <p>(forward primer, reverse primer,</p>
          <p>hydrolysis probe)</p></td>
        <td width="84" valign="top"><p><b>Nr cycles</b></p></td>
        <td width="113" valign="top"><p><b>Denaturation</b></p>
          <p><b>(°C / s)</b></p></td>
        <td width="91" valign="top"><p><b>Annealing</b></p>
          <p><b>(°C / s)</b></p></td>
        <td width="115" valign="top"><p><b>Amplification</b></p>
          <p><b>(°C / s)</b></p></td>
      </tr>
      <tr>
        <td width="119" valign="top"><p><i>Glomus intraradices</i></p></td>
        <td width="236" valign="top"><p>TTTTAGCGATAGCGTAACAGC,</p>
          <p>TACATCTAGGACAGGGTTTCG,</p>
          <p><b><i>FAM</i></b>-AAACTGCCAC</p>
          <p>TCCCTCCATATCCAA-<b><i>BHQ1</i></b></p></td>
        <td width="84" valign="top"><p>65</p></td>
        <td width="113" valign="top"><p>95 / 10</p></td>
        <td width="91" valign="top"><p>60 / 10</p></td>
        <td width="115" valign="top"><p>72 / 1</p></td>
      </tr>
      <tr>
        <td width="119" valign="top"><p><i>Glomus custos</i></p></td>
        <td width="236" valign="top"><p>TCTAACCCCAGAAATGTATAG,</p>
          <p>AAGGACTGCCTTGTGTTC,</p>
          <p><b><i>FAM</i></b>-ATACAATAATG</p>
          <p>GGCAATCAGACATATCGT-<b><i>BHQ1</i></b></p></td>
        <td width="84" valign="top"><p>65</p></td>
        <td width="113" valign="top"><p>95 / 10</p></td>
        <td width="91" valign="top"><p>62 / 15</p></td>
        <td width="115" valign="top"><p>72 / 1</p></td>
      </tr>
    </tbody></table>
    
      <!-- Content stops here!  Don't delete anything after this! -->
    
<hr>
        <p class="center">[<a href="default.php" target="_top">Back to E094-184</a>]</p>
    

<!--?php mysql_close($con); ?--></body></html>
